# Supplementary material for: Data-driven parcellation and graph theory analyses to study adolescent mood and anxiety symptoms
Source: PubMed Central journal article supplement (PMC8093238; doi:10.1038/s41398-021-01321-x), 2021-05-03
Supplement: 41398_2021_1321_MOESM1_ESM.pdf [file 41398_2021_1321_MOESM1_ESM.pdf]

Data-Driven Parcellation and Graph Theory Analyses to Study Adolescent Mood and Anxiety Symptoms

Benjamin A. Ely, PhD; Qi Liu, PhD; Samuel J. DeWitt, PhD; Lushna M. Mehra, BS;

Carmen M. Alonso, MD; Vilma Gabbay, MD

**Supplementary Materials**

## Supplementary Methods

### Construction of Reward Flanker Task (RFT) Networks

This study examined graph theoretical metrics within three reward-related networks derived from the RFT, described in detail in our previous studies.<sup>1,2</sup> The RFT was designed to distinguish neural activity during distinct phases of reward processing corresponding to the RFT networks used in the current study, i.e. reward anticipation, reward attainment, and reward prediction errors. Prior to fMRI, participants completed an RFT training session in a mock scanner to learn the rules of the task. In each RFT trial:

- 1) A cue was presented for 4-6s indicating how much money the participant could win in the current trial. Trial values consisted of high (50¢), low (10¢), no (0¢), or unknown (?) rewards. Outcomes for unknown cues were equally divided between high, low, and no rewards.
- 2) Flanker stimuli (e.g. “KKSkk”) were presented for 300ms.
- 3) Participants attempted to correctly identify the central letter while ignoring the flanking letters. Response windows were calibrated based on performance during training (max=1700ms).
- 4) Feedback (i.e. “Correct!”, “Incorrect!”, “Too Slow!”) was presented based on accuracy.

A total of 120 trials (30 per cue) were presented in pseudo-random order equally divided over four runs.

Subject-level RFT analysis was performed using Statistical Parametric Mapping (SPM)<sup>3</sup> v12 as part of a separate study in the same adolescent cohort (manuscript in preparation). Data preprocessing, multi-run ICA-FIX denoising, MSMAll alignment, and parcellation were identical to the procedures described in the main text **Methods**. GSR was not performed. Task data in CIFTI grayordinate space were temporarily converted to “pseudo-NIFTI” format for compatibility with SPM using Connectome Workbench v1.2.3.<sup>4</sup> General linear models were then constructed using 11 subject-level regressors: four for trial cues, three for correct feedback after certain (i.e. high/low/no) reward cues, three for correct feedback after unknown reward cues, and one for error (i.e. incorrect + too slow) feedback. Activation contrasts were constructed as:

- 1) *Reward Anticipation* = (high + low reward cues) – (no reward cues)
- 2) *Reward Attainment* = (high + low reward feedback) – (no reward feedback)
- 3) *Reward Prediction Error* = (feedback after unknown cues) – (feedback after certain cues)

The resulting subject-level contrast maps were converted back to CIFTI grayordinate format and combined at

the group level to create parcellated  $t$ -statistic maps using FSL PALM v111-alpha.<sup>5</sup> Finally, each group-level contrast map was thresholded at the 90<sup>th</sup> percentile to obtain a similar number of nodes (i.e. parcels) across contrasts. To avoid introducing artificial lateralization from arbitrary thresholding, each node was inspected and, if a corresponding contralateral node could be identified but was not already included in the network mask, the contralateral node was added. This yielded the final, symmetric network masks shown in main text **Figure 1**.

## Supplementary Results

### Group Difference and Symptom Correlations without Global Signal Regression (GSR)

Due to the large number of significant findings in our repeated analyses without GSR, results are presented in table format only. Note that **Table S2** (symptom correlations) is divided into five parts to keep related findings together while maintaining standard US page dimensions. Those interested in visualizing these results may download the complete dataset from our linked Balsa archive (<https://balsa.wustl.edu/study/show/x278x>).

| <b>Table S1:</b> Graph Theory Group Contrast Results without GSR                                                                                                                      |                  |                     |                                             |                                   |                               |
|---------------------------------------------------------------------------------------------------------------------------------------------------------------------------------------|------------------|---------------------|---------------------------------------------|-----------------------------------|-------------------------------|
| <b>Network</b>                                                                                                                                                                        | <b>Metric</b>    | <b>Location</b>     | <b>CAB-NP Label (HCP Label)<sup>a</sup></b> | <b>Cohen <i>d</i><sup>b</sup></b> | <b><i>p</i><sub>FWE</sub></b> |
| <i>Clinical &gt; Control Adolescents</i>                                                                                                                                              |                  |                     |                                             |                                   |                               |
| <i>Reward Anticipation</i>                                                                                                                                                            | C <sub>Str</sub> | Left Middle Frontal | Language_9 (55b)                            | 0.910                             | 0.030                         |
|                                                                                                                                                                                       | C <sub>Eig</sub> | Left Middle Frontal | Language_9 (55b)                            | 1.060                             | 0.013                         |
|                                                                                                                                                                                       | E <sub>Loc</sub> | Left Middle Frontal | Language_9 (55b)                            | 0.826                             | 0.047                         |
| <sup>a</sup> Labels per Cole-Anticevic Brain-wide Network Partition v1.0.5 (equivalent labels per HCP S1200 Release cortical parcellation).<br><sup>b</sup> Adjusted for age and sex. |                  |                     |                                             |                                   |                               |

**Table S2 (part 1):** Graph Theory Symptom Correlation Results without GSR

| Network                                | Metric                     | Location                   | CAB-NP Label (HCP Cortical Label) <sup>a</sup> | Pearson $r^b$ | $p_{FWE}$ |
|----------------------------------------|----------------------------|----------------------------|------------------------------------------------|---------------|-----------|
| <i>Depression Severity</i>             |                            |                            |                                                |               |           |
| Reward Attainment                      | C <sub>Str</sub>           | Right Ventral Striatum     | Cingulo-Opercular-3                            | 0.399         | 0.014     |
|                                        |                            | Right Inferior Pallidum    | Orbito-Affective-17                            | 0.372         | 0.031     |
|                                        | E <sub>Loc</sub>           | Right Ventral Striatum     | Cingulo-Opercular-3                            | 0.430         | 0.0053    |
| <i>Anticipatory Anhedonia Severity</i> |                            |                            |                                                |               |           |
| Whole Brain                            | C <sub>Str</sub>           | Left Superior Parietal     | Dorsal_Attention_13 (MIP)                      | 0.482         | 0.0071    |
|                                        |                            | Right Lateral Parietal     | Dorsal_Attention_10 (IP0)                      | 0.460         | 0.017     |
|                                        |                            | Left Lateral Temporal      | Default_66 (TE1a)                              | 0.455         | 0.022     |
|                                        |                            | Left Lateral Occipital     | Visual2_50 (V3CD)                              | 0.432         | 0.041     |
|                                        |                            | Right Lateral Occipital    | Visual2_12 (LO2)                               | 0.431         | 0.042     |
|                                        |                            | Left Lateral Temporal      | Default_64 (STSvp)                             | 0.428         | 0.046     |
|                                        |                            | Right Lateral Temporal     | Default_28 (TE1a)                              | 0.426         | 0.049     |
|                                        | E <sub>Loc</sub>           | Left Lateral Temporal      | Default_66 (TE1a)                              | 0.459         | 0.013     |
|                                        |                            | Left Superior Parietal     | Dorsal_Attention_13 (MIP)                      | 0.455         | 0.014     |
|                                        |                            | Left Lateral Occipital     | Visual2_50 (V3CD)                              | 0.444         | 0.018     |
|                                        |                            | Right Lateral Temporal     | Default_28 (TE1a)                              | 0.437         | 0.024     |
|                                        |                            | Right Lateral Parietal     | Dorsal_Attention_10 (IP0)                      | 0.436         | 0.026     |
|                                        |                            | Right Lateral Occipital    | Visual2_12 (LO2)                               | 0.435         | 0.026     |
|                                        |                            | Right Superior Parietal    | Dorsal_Attention_2 (LIPd)                      | 0.418         | 0.043     |
|                                        |                            | Left Lateral Temporal      | Default_64 (STSvp)                             | 0.417         | 0.045     |
|                                        |                            | Left Superior Parietal     | Visual2_43 (VIP)                               | 0.416         | 0.046     |
|                                        | Left sgACC                 | Default_74 (s32)           | 0.413                                          | 0.050         |           |
| Reward Anticipation                    | C <sub>Str</sub>           | Right Lateral Occipital    | Visual2_10 (V3B)                               | 0.392         | 0.029     |
|                                        |                            | Right Superior Parietal    | Dorsal_Attention_2 (LIPd)                      | 0.377         | 0.043     |
|                                        | E <sub>Loc</sub>           | Right Lateral Occipital    | Visual2_10 (V3B)                               | 0.386         | 0.023     |
|                                        |                            | Right Superior Parietal    | Dorsal_Attention_2 (LIPd)                      | 0.378         | 0.028     |
|                                        |                            | Right Lateral Occipital    | Visual2_12 (LO2)                               | 0.378         | 0.028     |
|                                        |                            | Left Lateral Occipital     | Visual2_37 (V3B)                               | 0.375         | 0.031     |
|                                        |                            | Left Middle Frontal Cortex | Language_9 (55b)                               | 0.374         | 0.031     |
|                                        |                            | Left Lateral Occipital     | Visual2_39 (LO2)                               | 0.371         | 0.034     |
| Left Superior Parietal                 | Dorsal_Attention_14 (LIPd) | 0.364                      | 0.040                                          |               |           |
| Reward Attainment                      | C <sub>Str</sub>           | Right Lateral Parietal     | Frontoparietal_21 (IP2)                        | 0.409         | 0.026     |
|                                        |                            | Left Lateral Temporal      | Frontoparietal_44 (TE1p)                       | 0.407         | 0.028     |
|                                        | E <sub>Loc</sub>           | Left sgACC                 | Default_74 (s32)                               | 0.407         | 0.023     |
|                                        |                            | Right Lateral Parietal     | Frontoparietal_21 (IP2)                        | 0.403         | 0.026     |
|                                        |                            | Right sgACC                | Default_6 (a24)                                | 0.384         | 0.044     |
|                                        |                            | Left dACC                  | Cingulo-Opercular_36 (33pr)                    | 0.381         | 0.046     |
| Reward Prediction Error                | C <sub>Str</sub>           | Left Superior Parietal     | Dorsal_Attention_13 (MIP)                      | 0.495         | <0.001    |
|                                        |                            | Right Lateral Parietal     | Dorsal_Attention_10 (IP0)                      | 0.449         | 0.0039    |
|                                        |                            | Right Lateral Occipital    | Visual2_10 (V3B)                               | 0.443         | 0.0050    |
|                                        |                            | Left dlPFC                 | Language_15 (IFJa)                             | 0.412         | 0.014     |
|                                        |                            | Left Lateral Temporal      | Default_64 (STSvp)                             | 0.415         | 0.013     |
|                                        |                            | Left Lateral Occipital     | Visual2_50 (V3CD)                              | 0.412         | 0.014     |
|                                        |                            | Right Lateral Occipital    | Visual2_12 (LO2)                               | 0.401         | 0.020     |
|                                        |                            | Right Superior Parietal    | Dorsal_Attention_1 (MIP)                       | 0.400         | 0.021     |
|                                        |                            | Right Superior Parietal    | Dorsal_Attention_2 (LIPd)                      | 0.402         | 0.019     |
|                                        |                            | Left Lateral Occipital     | Visual2_37 (V3B)                               | 0.394         | 0.025     |
|                                        |                            | Right Lateral Occipital    | Visual2_23 (V3CD)                              | 0.371         | 0.046     |
|                                        |                            | Left Lateral Parietal      | Dorsal_Attention_22 (IP0)                      | 0.371         | 0.047     |
| Left Superior Parietal                 | Dorsal_Attention_14 (LIPd) | 0.368                      | 0.050                                          |               |           |

(continued in **part 2**)

**Table S2 (part 2):** Graph Theory Symptom Correlation Results without GSR

| Network                                        | Metric             | Location                        | CAB-NP Label (HCP Cortical Label) <sup>a</sup> | Pearson $r$ <sup>b</sup> | $p_{FWE}$ |
|------------------------------------------------|--------------------|---------------------------------|------------------------------------------------|--------------------------|-----------|
| <i>Anticipatory Anhedonia Severity (con't)</i> |                    |                                 |                                                |                          |           |
| <i>Reward Prediction Error<br/>(con't)</i>     | $E_{Loc}$          | Left Superior Parietal          | Dorsal_Attention_13 (MIP)                      | 0.461                    | 0.0014    |
|                                                |                    | Left Superior PFC               | Frontoparietal_41 (i6-8)                       | 0.355                    | 0.045     |
|                                                |                    | Left dlPFC                      | Frontoparietal_32 (8C)                         | 0.369                    | 0.032     |
|                                                |                    | Left dlPFC                      | Language_15 (IFJa)                             | 0.411                    | 0.010     |
|                                                |                    | Left Lateral Temporal           | Language_20 (STSdp)                            | 0.352                    | 0.048     |
|                                                |                    | Left Lateral Temporal           | Default_64 (STSvp)                             | 0.419                    | 0.0072    |
|                                                |                    | Left Superior Parietal          | Visual2_42 (LIPv)                              | 0.396                    | 0.016     |
|                                                |                    | Left Superior Parietal          | Dorsal_Attention_14 (LIPd)                     | 0.395                    | 0.016     |
|                                                |                    | Left Lateral Parietal           | Dorsal_Attention_22 (IP0)                      | 0.397                    | 0.016     |
|                                                |                    | Left Lateral Occipital          | Visual2_37 (V3B)                               | 0.393                    | 0.017     |
|                                                |                    | Left Lateral Occipital          | Visual2_50 (V3CD)                              | 0.441                    | 0.0035    |
|                                                |                    | Left Lateral Occipital          | Visual2_38 (LO1)                               | 0.356                    | 0.045     |
|                                                |                    | Left Lateral Occipital          | Visual2_39 (LO2)                               | 0.400                    | 0.015     |
|                                                |                    | Left Lateral Occipital          | Visual2_48 (V4t)                               | 0.388                    | 0.020     |
|                                                |                    | Left Posterior Lateral Temporal | Visual2_27 (MST)                               | 0.373                    | 0.028     |
|                                                |                    | Left Posterior Lateral Temporal | Visual2_44 (PH)                                | 0.382                    | 0.022     |
|                                                |                    | Left Lateral Occipital          | Visual2_31 (V4)                                | 0.366                    | 0.035     |
|                                                |                    | Left Inferior Temporal          | Visual2_53 (VVC)                               | 0.419                    | 0.0075    |
|                                                |                    | Left Inferior Temporal          | Visual2_47 (VMV3)                              | 0.375                    | 0.026     |
|                                                |                    | Left Inferior Temporal          | Visual2_32 (V8)                                | 0.361                    | 0.039     |
|                                                |                    | Right Lateral Occipital         | Visual2_12 (LO2)                               | 0.417                    | 0.0080    |
|                                                |                    | Right Lateral Occipital         | Visual2_10 (V3B)                               | 0.423                    | 0.0064    |
|                                                |                    | Right Lateral Parietal          | Dorsal_Attention_10 (IP0)                      | 0.438                    | 0.0038    |
|                                                |                    | Right Superior Parietal         | Dorsal_Attention_2 (LIPd)                      | 0.407                    | 0.012     |
|                                                |                    | Right Superior Parietal         | Dorsal_Attention_1 (MIP)                       | 0.401                    | 0.014     |
|                                                |                    | Right Superior Parietal         | Visual2_15 (LIPv)                              | 0.378                    | 0.025     |
|                                                |                    | Right Lateral Occipital         | Visual2_4 (V4)                                 | 0.373                    | 0.028     |
|                                                |                    | Right Lateral Occipital         | Visual2_23 (V3CD)                              | 0.403                    | 0.013     |
|                                                |                    | Right Lateral Occipital         | Visual2_11 (LO1)                               | 0.400                    | 0.014     |
|                                                |                    | Right Inferior Temporal         | Visual2_13 (PIT)                               | 0.375                    | 0.026     |
|                                                |                    | Right Inferior Temporal         | Visual2_5 (V8)                                 | 0.374                    | 0.026     |
|                                                |                    | Right Inferior Temporal         | Visual2_20 (VMV3)                              | 0.358                    | 0.043     |
| Right Posterior Lateral Temporal               | Visual2_17 (PH)    | 0.382                           | 0.022                                          |                          |           |
| Right Posterior Lateral Temporal               | Visual2 (MST)      | 0.360                           | 0.040                                          |                          |           |
| Right Lateral Temporal                         | Default_26 (STSvp) | 0.383                           | 0.022                                          |                          |           |
| Right Lateral Occipital                        | Visual2_21 (V4t)   | 0.390                           | 0.019                                          |                          |           |
| <i>Consummatory Anhedonia Severity</i>         |                    |                                 |                                                |                          |           |
| <i>Whole Brain</i>                             | $C_{Str}$          | Right Cerebellum Lobule V       | Posterior Multimodal-18                        | 0.481                    | 0.0084    |
|                                                |                    | Left Inferior Parietal          | Visual2_34 (V7)                                | 0.443                    | 0.029     |
|                                                | $E_{Loc}$          | Right Cerebellum Lobule V       | Posterior Multimodal-18                        | 0.451                    | 0.016     |
| <i>Reward Prediction Error</i>                 | $C_{Str}$          | Left Lateral Occipital          | Visual2_37 (V3B)                               | 0.394                    | 0.026     |
|                                                |                    | Left Superior Parietal          | Dorsal_Attention_13 (MIP)                      | 0.374                    | 0.044     |

*(continued in part 3)*

**Table S2 (part 3): Graph Theory Symptom Correlation Results without GSR**

| Network                         | Metric                    | Location                 | CAB-NP Label (HCP Cortical Label) <sup>a</sup> | Pearson <i>r</i> <sup>b</sup> | <i>p</i> <sub>FWE</sub> |
|---------------------------------|---------------------------|--------------------------|------------------------------------------------|-------------------------------|-------------------------|
| <i>Total Anhedonia Severity</i> |                           |                          |                                                |                               |                         |
| <i>Whole Brain</i>              | C <sub>Str</sub>          | Left Superior Parietal   | Dorsal_Attention_13 (MIP)                      | 0.483                         | 0.0088                  |
|                                 |                           | Left Lateral Temporal    | Default_66 (TE1a)                              | 0.449                         | 0.027                   |
|                                 |                           | Left Lateral Temporal    | Default_64 (STSvp)                             | 0.438                         | 0.038                   |
|                                 |                           | Left Superior Parietal   | Visual2_43 (VIP)                               | 0.456                         | 0.022                   |
|                                 |                           | Left Superior Parietal   | Visual2_35 (IPS1)                              | 0.453                         | 0.024                   |
|                                 |                           | Left Inferior Parietal   | Visual2_34 (V7)                                | 0.467                         | 0.015                   |
|                                 |                           | Left Lateral Occipital   | Visual2_37 (V3B)                               | 0.458                         | 0.021                   |
|                                 |                           | Left Lateral Occipital   | Visual2_50 (V3CD)                              | 0.456                         | 0.022                   |
|                                 |                           | Right Lateral Parietal   | Dorsal_Attention_10 (IP0)                      | 0.470                         | 0.014                   |
|                                 |                           | Right Lateral Occipital  | Visual2_10 (V3B)                               | 0.459                         | 0.020                   |
|                                 |                           | Right Lateral Temporal   | Default_28 (TE1a)                              | 0.449                         | 0.026                   |
|                                 |                           | Right Inferior Parietal  | Visual2_8 (IPS1)                               | 0.446                         | 0.030                   |
|                                 |                           | Right Somatomotor Strip  | Somatomotor_Leg (4-LL)                         | 0.439                         | 0.038                   |
|                                 |                           | Right Superior Occipital | Visual2_7 (V7)                                 | 0.437                         | 0.039                   |
|                                 |                           | Right Lateral Occipital  | Visual2_11 (LO1)                               | 0.434                         | 0.043                   |
|                                 |                           | Right Parahippocampus    | Dorsal_Attention_6 (PHA3)                      | 0.440                         | 0.036                   |
|                                 | Right Cerebellum Lobule V | Posterior Multimodal-18  | 0.473                                          | 0.013                         |                         |
|                                 | E <sub>Loc</sub>          | Left Lateral Occipital   | Visual2_50 (V3CD)                              | 0.468                         | 0.0092                  |
|                                 |                           | Left Lateral Temporal    | Default_66 (TE1a)                              | 0.460                         | 0.013                   |
|                                 |                           | Left Superior Parietal   | Dorsal_Attention_13 (MIP)                      | 0.456                         | 0.015                   |
|                                 |                           | Left Inferior Parietal   | Visual2_34 (V7)                                | 0.455                         | 0.015                   |
|                                 |                           | Right Lateral Temporal   | Default_28 (TE1a)                              | 0.456                         | 0.015                   |
|                                 |                           | Right Lateral Temporal   | Default_36 (STSva)                             | 0.449                         | 0.019                   |
|                                 |                           | Left vmPFC               | Default_56 (10v)                               | 0.450                         | 0.019                   |
|                                 |                           | Right vmPFC              | Default_18 (10v)                               | 0.444                         | 0.022                   |
|                                 |                           | Left Superior Parietal   | Visual2_35 (IPS1)                              | 0.448                         | 0.020                   |
|                                 |                           | Left Superior Parietal   | Visual2_43 (VIP)                               | 0.451                         | 0.018                   |
|                                 |                           | Left Lateral Occipital   | Visual2_37 (V3B)                               | 0.443                         | 0.023                   |
|                                 |                           | Right Lateral Parietal   | Dorsal_Attention_10 (IP0)                      | 0.447                         | 0.020                   |
|                                 |                           | Right Parahippocampus    | Dorsal_Attention_6 (PHA3)                      | 0.450                         | 0.019                   |
|                                 |                           | Right Parahippocampus    | Default_32 (PHA2)                              | 0.419                         | 0.047                   |
|                                 |                           | Right Inferior Parietal  | Visual2_8 (IPS1)                               | 0.438                         | 0.026                   |
|                                 |                           | Right Lateral Occipital  | Visual2_10 (V3B)                               | 0.439                         | 0.026                   |
|                                 |                           | Right Superior Occipital | Visual2_7 (V7)                                 | 0.431                         | 0.033                   |
|                                 |                           | Right Lateral Occipital  | Visual2_11 (LO1)                               | 0.438                         | 0.027                   |
|                                 |                           | Right Lateral Occipital  | Visual2_12 (LO2)                               | 0.427                         | 0.038                   |
|                                 |                           | Left Lateral Occipital   | Visual2_39 (LO2)                               | 0.434                         | 0.030                   |
|                                 |                           | Right Lateral Occipital  | Visual2_23 (V3CD)                              | 0.422                         | 0.044                   |
|                                 |                           | Left Lateral Parietal    | Default_68 (PGi)                               | 0.431                         | 0.033                   |
|                                 |                           | Left Lateral Temporal    | Default_64 (STSvp)                             | 0.436                         | 0.029                   |
|                                 |                           | Left Temporal Pole       | Language_17 (STGa)                             | 0.418                         | 0.047                   |
|                                 |                           | Left Lateral Temporal    | Default_75 (STSva)                             | 0.421                         | 0.044                   |
|                                 |                           | Right Somatomotor Strip  | Somatomotor_Leg (4-LL)                         | 0.436                         | 0.029                   |
| Left Superior Parietal          |                           | Visual2_42 (LIPv)        | 0.417                                          | 0.049                         |                         |
| Right Superior Parietal         | Dorsal_Attention_1 (MIP)  | 0.421                    | 0.044                                          |                               |                         |
| Left sgACC                      | Default_74 (s32)          | 0.420                    | 0.045                                          |                               |                         |
| Right Cerebellum Lobule V       | Posterior Multimodal-18   | 0.466                    | 0.010                                          |                               |                         |
| Right Hippocampus               | Visual2-25                | 0.419                    | 0.046                                          |                               |                         |
| <i>Reward Anticipation</i>      | C <sub>Str</sub>          | Right Lateral Occipital  | Visual2_10 (V3B)                               | 0.405                         | 0.021                   |
|                                 |                           | Left Lateral Occipital   | Visual2_37 (V3B)                               | 0.385                         | 0.035                   |
|                                 | E <sub>Loc</sub>          | Left Lateral Occipital   | Visual2_39 (LO2)                               | 0.382                         | 0.024                   |
|                                 |                           | Right Lateral Occipital  | Visual2_10 (V3B)                               | 0.379                         | 0.026                   |
|                                 |                           | Left Lateral Occipital   | Visual2_37 (V3B)                               | 0.378                         | 0.027                   |
|                                 |                           | Left Middle Frontal      | Language_9 (55b)                               | 0.357                         | 0.047                   |
|                                 |                           | Right Lateral Occipital  | Visual2_12 (LO2)                               | 0.358                         | 0.046                   |

*(continued in part 4)*

**Table S2 (part 4):** Graph Theory Symptom Correlation Results without GSR

| Network                                 | Metric           | Location                         | CAB-NP Label (HCP Cortical Label) <sup>a</sup> | Pearson <i>r</i> <sup>b</sup> | <i>p</i> <sub>FWE</sub> |
|-----------------------------------------|------------------|----------------------------------|------------------------------------------------|-------------------------------|-------------------------|
| <i>Total Anhedonia Severity (con't)</i> |                  |                                  |                                                |                               |                         |
| Reward Attainment                       | C <sub>Str</sub> | Right Inferior Parietal          | Frontoparietal_21 (IP2)                        | 1.335                         | 0.046                   |
|                                         | E <sub>Loc</sub> | Left sgACC                       | Default_74 (s32)                               | 0.398                         | 0.028                   |
|                                         |                  | Left sgACC                       | Default_46 (10r)                               | 0.389                         | 0.036                   |
|                                         |                  | Left Lateral Occipital           | Visual2_33 (V3A)                               | 0.395                         | 0.031                   |
|                                         |                  | Right Lateral Occipital          | Visual2_6 (V3A)                                | 0.379                         | 0.047                   |
| Reward Prediction Error                 | C <sub>Str</sub> | Left Superior Parietal           | Dorsal_Attention_13 (MIP)                      | 0.494                         | <0.001                  |
|                                         |                  | Right Lateral Occipital          | Visual2_10 (V3B)                               | 0.460                         | 0.0037                  |
|                                         |                  | Right Lateral Parietal           | Dorsal_Attention_10 (IP0)                      | 0.447                         | 0.0056                  |
|                                         |                  | Left Lateral Occipital           | Visual2_37 (V3B)                               | 0.445                         | 0.0058                  |
|                                         |                  | Left Lateral Temporal            | Default_64 (STSvp)                             | 0.435                         | 0.0074                  |
|                                         |                  | Right Superior Parietal          | Dorsal_Attention_1 (MIP)                       | 0.432                         | 0.0078                  |
|                                         |                  | Left Lateral Occipital           | Visual2_50 (V3CD)                              | 0.413                         | 0.014                   |
|                                         |                  | Left Lateral Occipital           | Visual2_39 (LO2)                               | 0.393                         | 0.025                   |
|                                         |                  | Right Lateral Occipital          | Visual2_11 (LO1)                               | 0.394                         | 0.024                   |
|                                         |                  | Left dlPFC                       | Language_15 (IFJa)                             | 0.389                         | 0.028                   |
|                                         |                  | Left dlPFC                       | Frontoparietal_32 (8C)                         | 0.381                         | 0.036                   |
|                                         |                  | Right Lateral Occipital          | Visual2_12 (LO2)                               | 0.384                         | 0.032                   |
|                                         |                  | Right Posterior Lateral Temporal | Visual2 (MST)                                  | 0.378                         | 0.039                   |
|                                         |                  | Right Posterior Lateral Temporal | Visual2_17 (PH)                                | 0.372                         | 0.046                   |
|                                         |                  | Right Lateral Temporal           | Default_26 (STSvp)                             | 0.382                         | 0.035                   |
|                                         |                  | Left Lateral Occipital           | Visual2_38 (LO1)                               | 0.371                         | 0.047                   |
|                                         |                  | Left Superior Parietal           | Visual2_42 (LIPv)                              | 0.369                         | 0.049                   |
|                                         |                  | Left Lateral Parietal            | Dorsal_Attention_22 (IP0)                      | 0.371                         | 0.047                   |

*(continued in part 5)*

**Table S2 (part 5):** Graph Theory Symptom Correlation Results without GSR

| Network                                 | Metric                    | Location                         | CAB-NP Label (HCP Cortical Label) <sup>a</sup> | Pearson <i>r</i> <sup>b</sup> | <i>p</i> <sub>FWE</sub> |
|-----------------------------------------|---------------------------|----------------------------------|------------------------------------------------|-------------------------------|-------------------------|
| <i>Total Anhedonia Severity (con't)</i> |                           |                                  |                                                |                               |                         |
| <i>Reward Prediction Error (con't)</i>  | <i>E<sub>Loc</sub></i>    | Left Superior Parietal           | Dorsal_Attention_13 (MIP)                      | 0.448                         | 0.0036                  |
|                                         |                           | Left Lateral Occipital           | Visual2_50 (V3CD)                              | 0.434                         | 0.0050                  |
|                                         |                           | Left Lateral Temporal            | Default_64 (STSvp)                             | 0.432                         | 0.0053                  |
|                                         |                           | Right Lateral Occipital          | Visual2_10 (V3B)                               | 0.430                         | 0.0055                  |
|                                         |                           | Right Lateral Parietal           | Dorsal_Attention_10 (IP0)                      | 0.423                         | 0.0079                  |
|                                         |                           | Right Superior Parietal          | Dorsal_Attention_1 (MIP)                       | 0.419                         | 0.0090                  |
|                                         |                           | Left Lateral Occipital           | Visual2_37 (V3B)                               | 0.417                         | 0.0092                  |
|                                         |                           | Right Lateral Occipital          | Visual2_11 (LO1)                               | 0.413                         | 0.011                   |
|                                         |                           | Right Lateral Temporal           | Default_26 (STSvp)                             | 0.402                         | 0.014                   |
|                                         |                           | Left Lateral Occipital           | Visual2_39 (LO2)                               | 0.406                         | 0.013                   |
|                                         |                           | Right Posterior Lateral Temporal | Visual2 (MST)                                  | 0.399                         | 0.015                   |
|                                         |                           | Right Lateral Occipital          | Visual2_23 (V3CD)                              | 0.397                         | 0.016                   |
|                                         |                           | Left Superior Parietal           | Visual2_42 (LIPv)                              | 0.394                         | 0.017                   |
|                                         |                           | Right Superior Parietal          | Visual2_15 (LIPv)                              | 0.386                         | 0.020                   |
|                                         |                           | Left Inferior Temporal           | Visual2_53 (VVC)                               | 0.395                         | 0.017                   |
|                                         |                           | Left Inferior Temporal           | Visual2_47 (VMV3)                              | 0.378                         | 0.023                   |
|                                         |                           | Left Lateral Occipital           | Visual2_31 (V4)                                | 0.375                         | 0.025                   |
|                                         |                           | Right Lateral Occipital          | Visual2_4 (V4)                                 | 0.372                         | 0.027                   |
|                                         |                           | Left dIPFC                       | Language_15 (IFJa)                             | 0.391                         | 0.018                   |
|                                         |                           | Right Posterior Lateral Temporal | Visual2_17 (PH)                                | 0.381                         | 0.021                   |
|                                         |                           | Left dIPFC                       | Frontoparietal_32 (8C)                         | 0.383                         | 0.021                   |
|                                         |                           | Left Lateral Occipital           | Visual2_38 (LO1)                               | 0.387                         | 0.020                   |
|                                         |                           | Left Lateral Parietal            | Dorsal_Attention_22 (IP0)                      | 0.384                         | 0.021                   |
|                                         |                           | Left Lateral Occipital           | Visual2_48 (V4t)                               | 0.389                         | 0.019                   |
|                                         |                           | Left Posterior Lateral Temporal  | Visual2_27 (MST)                               | 0.386                         | 0.020                   |
|                                         |                           | Right Lateral Occipital          | Visual2_12 (LO2)                               | 0.388                         | 0.019                   |
|                                         |                           | Right Lateral Occipital          | Visual2_21 (V4t)                               | 0.382                         | 0.021                   |
|                                         |                           | Left Lateral Temporal            | Language_20 (STSdp)                            | 0.379                         | 0.023                   |
|                                         |                           | Left Superior Parietal           | Dorsal_Attention_14 (LIPd)                     | 0.369                         | 0.030                   |
|                                         |                           | Left Posterior Lateral Temporal  | Visual2_44 (PH)                                | 0.369                         | 0.029                   |
|                                         |                           | Left Inferior Temporal           | Visual2_32 (V8)                                | 0.369                         | 0.030                   |
|                                         |                           | Right Inferior Temporal          | Visual2_20 (VMV3)                              | 0.368                         | 0.031                   |
| Right Inferior Temporal                 | Visual2_5 (V8)            | 0.359                            | 0.037                                          |                               |                         |
| Right Inferior Temporal                 | Visual2_13 (PIT)          | 0.354                            | 0.043                                          |                               |                         |
| Right Lateral Temporal                  | Language_6 (STSdp)        | 0.349                            | 0.048                                          |                               |                         |
| Right Superior Parietal                 | Dorsal_Attention_2 (LIPd) | 0.360                            | 0.036                                          |                               |                         |

<sup>a</sup> Labels per Cole-Anticevic Brain-wide Network Partition v1.0.5 (equivalent labels per HCP S1200 Release cortical parcellation).  
<sup>b</sup> Adjusted for age and sex. Anhedonia correlations reported with negative TEPS for consistency with other scales (see **Methods**).

## Supplementary References

- 1 Bradley, K. A. L., Case, J. A. C., Freed, R. D., Stern, E. R. & Gabbay, V. Neural correlates of RDoC reward constructs in adolescents with diverse psychiatric symptoms: A Reward Flanker Task pilot study. *J Affect Disord* **216**, 36-45, doi:10.1016/j.jad.2016.11.042 (2017).
- 2 Bradley, K. A. *et al.* Relationships between neural activation during a reward task and peripheral cytokine levels in youth with diverse psychiatric symptoms. *Brain Behav Immun* **80**, 374-383, doi:10.1016/j.bbi.2019.04.014 (2019).
- 3 Friston, K. J. *et al.* Statistical parametric maps in functional imaging: a general linear approach. *Hum Brain Mapp* **2**, 189-210, doi:10.1002/hbm.460020402 (1994).
- 4 Marcus, D. S. *et al.* Human Connectome Project informatics: quality control, database services, and data visualization. *NeuroImage* **80**, 202-219, doi:10.1016/j.neuroimage.2013.05.077 (2013).
- 5 Winkler, A. M., Ridgway, G. R., Webster, M. A., Smith, S. M. & Nichols, T. E. Permutation inference for the general linear model. *NeuroImage* **92**, 381-397, doi:10.1016/j.neuroimage.2014.01.060 (2014).
